# Supplementary material for: Sirtuin‐5 Is Recruited to Hepatic Peroxisomes in Mice Fed Dodecanedioic Acid but Has Little Impact on the Peroxisomal Succinylome
Source: Preprints.org preprint supplement (doi:10.20944/preprints202410.2196.v1), 2024-10-28
Supplement: Supplementary file 1 [file supplementary]

## Sheet: Supplement Table 1. Sirt5 Co-IP
Identified proteins from SIRT5 Co-IP with ≥ 10% peptide coverage	Accession Number	Molecular Weight	Coverage %
URIC_MOUSE Uricase OS=Mus musculus GN=Uox PE=1 SV=2	P25688	35 kDa	0.858
DHB4_MOUSE Peroxisomal multifunctional enzyme type 2 OS=Mus musculus GN=Hsd17b4 PE=1 SV=3	P51660	79 kDa	0.737
ATPB_MOUSE ATP synthase subunit beta, mitochondrial OS=Mus musculus GN=Atp5b PE=1 SV=2	P56480	56 kDa	0.699
ECHP_MOUSE Peroxisomal bifunctional enzyme OS=Mus musculus GN=Ehhadh PE=1 SV=4	Q9DBM2	78 kDa	0.652
ATPA_MOUSE ATP synthase subunit alpha, mitochondrial OS=Mus musculus GN=Atp5a1 PE=1 SV=1	Q03265	60 kDa	0.644
MOSC1_MOUSE MOSC domain-containing protein 1, mitochondrial OS=Mus musculus GN=Marc1 PE=1 SV=2	Q9CW42	38 kDa	0.621
GCDH_MOUSE Glutaryl-CoA dehydrogenase, mitochondrial OS=Mus musculus GN=Gcdh PE=1 SV=2	Q60759	49 kDa	0.61
ORNT1_MOUSE Mitochondrial ornithine transporter 1 OS=Mus musculus GN=Slc25a15 PE=2 SV=1	Q9WVD5	33 kDa	0.598
HIUH_MOUSE 5-hydroxyisourate hydrolase OS=Mus musculus GN=Urah PE=1 SV=1	Q9CRB3	14 kDa	0.593
K1C18_MOUSE Keratin, type I cytoskeletal 18 OS=Mus musculus GN=Krt18 PE=1 SV=5	P05784	48 kDa	0.593
AT5F1_MOUSE ATP synthase F(0) complex subunit B1, mitochondrial OS=Mus musculus GN=Atp5f1 PE=1 SV=1	Q9CQQ7	29 kDa	0.566
PHB_MOUSE Prohibitin OS=Mus musculus GN=Phb PE=1 SV=1	P67778	30 kDa	0.562
CPSM_MOUSE Carbamoyl-phosphate synthase [ammonia], mitochondrial OS=Mus musculus GN=Cps1 PE=1 SV=2	Q8C196	165 kDa	0.55
PHB2_MOUSE Prohibitin-2 OS=Mus musculus GN=Phb2 PE=1 SV=1	O35129	33 kDa	0.548
FIBG_MOUSE Fibrinogen gamma chain OS=Mus musculus GN=Fgg PE=2 SV=1	Q8VCM7	49 kDa	0.525
Q99N15_MOUSE 17beta-hydroxysteroid dehydrogenase type 10/short chain L-3-hydroxyacyl-CoA dehydrogenase OS=Mus musculus GN=Hsd17b10 PE=2 SV=1	Q99N15	27 kDa	0.525
ADT2_MOUSE ADP/ATP translocase 2 OS=Mus musculus GN=Slc25a5 PE=1 SV=3	P51881	33 kDa	0.517
CP4AE_MOUSE Cytochrome P450 4A14 OS=Mus musculus GN=Cyp4a14 PE=2 SV=1	O35728	59 kDa	0.513
RL30_MOUSE 60S ribosomal protein L30 OS=Mus musculus GN=Rpl30 PE=2 SV=2	P62889	13 kDa	0.513
ATP5I_MOUSE ATP synthase subunit e, mitochondrial OS=Mus musculus GN=Atp5i PE=1 SV=2	Q06185	8 kDa	0.507
ACTB_MOUSE Actin, cytoplasmic 1 OS=Mus musculus GN=Actb PE=1 SV=1	P60710	42 kDa	0.501
ACD11_MOUSE Acyl-CoA dehydrogenase family member 11 OS=Mus musculus GN=Acad11 PE=1 SV=2	Q80XL6	87 kDa	0.497
DECR2_MOUSE Peroxisomal 2,4-dienoyl-CoA reductase OS=Mus musculus GN=Decr2 PE=1 SV=1	Q9WV68	31 kDa	0.486
BHMT1_MOUSE Betaine--homocysteine S-methyltransferase 1 OS=Mus musculus GN=Bhmt PE=2 SV=1	O35490	45 kDa	0.482
IGKC_MOUSE Ig kappa chain C region OS=Mus musculus PE=1 SV=1	P01837	12 kDa	0.453
SFXN1_MOUSE Sideroflexin-1 OS=Mus musculus GN=Sfxn1 PE=1 SV=3	Q99JR1	36 kDa	0.447
RM23_MOUSE 39S ribosomal protein L23, mitochondrial OS=Mus musculus GN=Mrpl23 PE=2 SV=1	O35972	17 kDa	0.445
GRP78_MOUSE 78 kDa glucose-regulated protein OS=Mus musculus GN=Hspa5 PE=1 SV=3	P20029	72 kDa	0.441
NDUS3_MOUSE NADH dehydrogenase [ubiquinone] iron-sulfur protein 3, mitochondrial OS=Mus musculus GN=Ndufs3 PE=1 SV=2	Q9DCT2	30 kDa	0.437
USMG5_MOUSE Up-regulated during skeletal muscle growth protein 5 OS=Mus musculus GN=Usmg5 PE=1 SV=1	Q78IK2	6 kDa	0.431
RL12_MOUSE 60S ribosomal protein L12 OS=Mus musculus GN=Rpl12 PE=1 SV=2	P35979	18 kDa	0.43
CP2CT_MOUSE Cytochrome P450 2C29 OS=Mus musculus GN=Cyp2c29 PE=1 SV=2	Q64458	56 kDa	0.424
QCR2_MOUSE Cytochrome b-c1 complex subunit 2, mitochondrial OS=Mus musculus GN=Uqcrc2 PE=1 SV=1	Q9DB77	48 kDa	0.424
ECHA_MOUSE Trifunctional enzyme subunit alpha, mitochondrial OS=Mus musculus GN=Hadha PE=1 SV=1	Q8BMS1	83 kDa	0.422
NDUS1_MOUSE NADH-ubiquinone oxidoreductase 75 kDa subunit, mitochondrial OS=Mus musculus GN=Ndufs1 PE=1 SV=2	Q91VD9	80 kDa	0.415
B1AQR8_MOUSE Galectin OS=Mus musculus GN=Lgals9 PE=2 SV=1	B1AQR8 (+3)	40 kDa	0.412
DHB13_MOUSE Isoform 2 of 17-beta-hydroxysteroid dehydrogenase 13 OS=Mus musculus GN=Hsd17b13	Q8VCR2-2	33 kDa	0.407
Q8C2Q8_MOUSE ATP synthase subunit gamma OS=Mus musculus GN=Atp5c1 PE=2 SV=1	Q8C2Q8	30 kDa	0.405
RL23_MOUSE 60S ribosomal protein L23 OS=Mus musculus GN=Rpl23 PE=1 SV=1	P62830	15 kDa	0.4
D3YW32_MOUSE NADH dehydrogenase [ubiquinone] iron-sulfur protein 6, mitochondrial OS=Mus musculus GN=Ndufs6 PE=2 SV=1	D3YW32 (+1)	11 kDa	0.398
NDUA5_MOUSE NADH dehydrogenase [ubiquinone] 1 alpha subcomplex subunit 5 OS=Mus musculus GN=Ndufa5 PE=1 SV=3	Q9CPP6	13 kDa	0.397
ACOX1_MOUSE Peroxisomal acyl-coenzyme A oxidase 1 OS=Mus musculus GN=Acox1 PE=1 SV=5	Q9R0H0	75 kDa	0.396
COMT_MOUSE Catechol O-methyltransferase OS=Mus musculus GN=Comt PE=1 SV=2	O88587 (+1)	29 kDa	0.396
RL13_MOUSE 60S ribosomal protein L13 OS=Mus musculus GN=Rpl13 PE=2 SV=3	P47963	24 kDa	0.393
D3Z041_MOUSE Long-chain-fatty-acid--CoA ligase 1 OS=Mus musculus GN=Acsl1 PE=2 SV=1	D3Z041 (+1)	78 kDa	0.391
NDUS2_MOUSE NADH dehydrogenase [ubiquinone] iron-sulfur protein 2, mitochondrial OS=Mus musculus GN=Ndufs2 PE=1 SV=1	Q91WD5	53 kDa	0.384
NDUA4_MOUSE NADH dehydrogenase [ubiquinone] 1 alpha subcomplex subunit 4 OS=Mus musculus GN=Ndufa4 PE=1 SV=2	Q62425	9 kDa	0.378
THIM_MOUSE 3-ketoacyl-CoA thiolase, mitochondrial OS=Mus musculus GN=Acaa2 PE=1 SV=3	Q8BWT1	42 kDa	0.378
DIC_MOUSE Mitochondrial dicarboxylate carrier OS=Mus musculus GN=Slc25a10 PE=1 SV=2	Q9QZD8	32 kDa	0.376
RL3_MOUSE 60S ribosomal protein L3 OS=Mus musculus GN=Rpl3 PE=1 SV=3	P27659	46 kDa	0.375
NDUA8_MOUSE NADH dehydrogenase [ubiquinone] 1 alpha subcomplex subunit 8 OS=Mus musculus GN=Ndufa8 PE=1 SV=3	Q9DCJ5	20 kDa	0.372
RL5_MOUSE 60S ribosomal protein L5 OS=Mus musculus GN=Rpl5 PE=1 SV=3	P47962	34 kDa	0.367
VDAC1_MOUSE Isoform Mt-VDAC1 of Voltage-dependent anion-selective channel protein 1 OS=Mus musculus GN=Vdac1	Q60932-2	31 kDa	0.367
NDUAC_MOUSE NADH dehydrogenase [ubiquinone] 1 alpha subcomplex subunit 12 OS=Mus musculus GN=Ndufa12 PE=2 SV=2	Q7TMF3	17 kDa	0.366
ATPO_MOUSE ATP synthase subunit O, mitochondrial OS=Mus musculus GN=Atp5o PE=1 SV=1	Q9DB20	23 kDa	0.362
CMC2_MOUSE Calcium-binding mitochondrial carrier protein Aralar2 OS=Mus musculus GN=Slc25a13 PE=1 SV=1	Q9QXX4	74 kDa	0.362
E9QJW0_MOUSE Microsomal glutathione S-transferase 1 OS=Mus musculus GN=Mgst1 PE=2 SV=1	E9QJW0 (+1)	26 kDa	0.362
ASSY_MOUSE Argininosuccinate synthase OS=Mus musculus GN=Ass1 PE=1 SV=1	P16460	47 kDa	0.354
CP2E1_MOUSE Cytochrome P450 2E1 OS=Mus musculus GN=Cyp2e1 PE=2 SV=1	Q05421	57 kDa	0.349
NDUB4_MOUSE NADH dehydrogenase [ubiquinone] 1 beta subcomplex subunit 4 OS=Mus musculus GN=Ndufb4 PE=1 SV=3	Q9CQC7	15 kDa	0.349
RL32_MOUSE 60S ribosomal protein L32 OS=Mus musculus GN=Rpl32 PE=2 SV=2	P62911	16 kDa	0.348
RL4_MOUSE 60S ribosomal protein L4 OS=Mus musculus GN=Rpl4 PE=1 SV=3	Q9D8E6	47 kDa	0.341
RL6_MOUSE 60S ribosomal protein L6 OS=Mus musculus GN=Rpl6 PE=1 SV=3	P47911	34 kDa	0.341
KMO_MOUSE Kynurenine 3-monooxygenase OS=Mus musculus GN=Kmo PE=2 SV=1	Q91WN4	55 kDa	0.34
ECHB_MOUSE Trifunctional enzyme subunit beta, mitochondrial OS=Mus musculus GN=Hadhb PE=1 SV=1	Q99JY0	51 kDa	0.339
RL8_MOUSE 60S ribosomal protein L8 OS=Mus musculus GN=Rpl8 PE=2 SV=2	P62918	28 kDa	0.339
G5E850_MOUSE Cytochrome b-5, isoform CRA_a OS=Mus musculus GN=Cyb5 PE=3 SV=1	G5E850 (+1)	11 kDa	0.337
CATA_MOUSE Catalase OS=Mus musculus GN=Cat PE=1 SV=4	P24270	60 kDa	0.332
CP3AB_MOUSE Cytochrome P450 3A11 OS=Mus musculus GN=Cyp3a11 PE=1 SV=1	Q64459	58 kDa	0.329
NDUA9_MOUSE NADH dehydrogenase [ubiquinone] 1 alpha subcomplex subunit 9, mitochondrial OS=Mus musculus GN=Ndufa9 PE=1 SV=2	Q9DC69	43 kDa	0.329
M2OM_MOUSE Mitochondrial 2-oxoglutarate/malate carrier protein OS=Mus musculus GN=Slc25a11 PE=1 SV=3	Q9CR62	34 kDa	0.328
NDUAD_MOUSE NADH dehydrogenase [ubiquinone] 1 alpha subcomplex subunit 13 OS=Mus musculus GN=Ndufa13 PE=1 SV=3	Q9ERS2	17 kDa	0.326
RL37A_MOUSE 60S ribosomal protein L37a OS=Mus musculus GN=Rpl37a PE=2 SV=2	P61514	10 kDa	0.326
CP2DA_MOUSE Cytochrome P450 2D10 OS=Mus musculus GN=Cyp2d10 PE=2 SV=2	P24456	57 kDa	0.315
MPCP_MOUSE Phosphate carrier protein, mitochondrial OS=Mus musculus GN=Slc25a3 PE=1 SV=1	Q8VEM8	40 kDa	0.314
H4_MOUSE Histone H4 OS=Mus musculus GN=Hist1h4a PE=1 SV=2	P62806	11 kDa	0.311
RS4X_MOUSE 40S ribosomal protein S4, X isoform OS=Mus musculus GN=Rps4x PE=2 SV=2	P62702	30 kDa	0.308
RS8_MOUSE 40S ribosomal protein S8 OS=Mus musculus GN=Rps8 PE=2 SV=2	P62242	24 kDa	0.308
RS14_MOUSE 40S ribosomal protein S14 OS=Mus musculus GN=Rps14 PE=2 SV=3	P62264	16 kDa	0.305
MTCH2_MOUSE Mitochondrial carrier homolog 2 OS=Mus musculus GN=Mtch2 PE=1 SV=1	Q791V5	33 kDa	0.304
NDUV1_MOUSE NADH dehydrogenase [ubiquinone] flavoprotein 1, mitochondrial OS=Mus musculus GN=Ndufv1 PE=1 SV=1	Q91YT0	51 kDa	0.302
QCR1_MOUSE Cytochrome b-c1 complex subunit 1, mitochondrial OS=Mus musculus GN=Uqcrc1 PE=1 SV=2	Q9CZ13	53 kDa	0.302
H2A1_MOUSE Histone H2A type 1 OS=Mus musculus GN=Hist1h2ab PE=1 SV=3	P22752 (+4)	14 kDa	0.3
FIBB_MOUSE Fibrinogen beta chain OS=Mus musculus GN=Fgb PE=2 SV=1	Q8K0E8	55 kDa	0.299
DHI1_MOUSE Corticosteroid 11-beta-dehydrogenase isozyme 1 OS=Mus musculus GN=Hsd11b1 PE=1 SV=3	P50172 (+1)	32 kDa	0.295
RL27_MOUSE 60S ribosomal protein L27 OS=Mus musculus GN=Rpl27 PE=1 SV=2	P61358	16 kDa	0.294
UD19_MOUSE UDP-glucuronosyltransferase 1-9 OS=Mus musculus GN=Ugt1a9 PE=2 SV=3	Q62452	60 kDa	0.294
DHSB_MOUSE Succinate dehydrogenase [ubiquinone] iron-sulfur subunit, mitochondrial OS=Mus musculus GN=Sdhb PE=1 SV=1	Q9CQA3	32 kDa	0.291
ECHM_MOUSE Enoyl-CoA hydratase, mitochondrial OS=Mus musculus GN=Echs1 PE=1 SV=1	Q8BH95	31 kDa	0.29
K1C17_MOUSE Keratin, type I cytoskeletal 17 OS=Mus musculus GN=Krt17 PE=1 SV=3	Q9QWL7	48 kDa	0.289
UD2A3_MOUSE UDP-glucuronosyltransferase 2A3 OS=Mus musculus GN=Ugt2a3 PE=2 SV=1	Q8BWQ1	61 kDa	0.288
HMCS2_MOUSE Hydroxymethylglutaryl-CoA synthase, mitochondrial OS=Mus musculus GN=Hmgcs2 PE=1 SV=2	P54869	57 kDa	0.287
THTR_MOUSE Thiosulfate sulfurtransferase OS=Mus musculus GN=Tst PE=1 SV=3	P52196	33 kDa	0.283
Q8R084_MOUSE Protein Ugt2b1 OS=Mus musculus GN=Ugt2b1 PE=2 SV=1	Q8R084	60 kDa	0.282
RS3_MOUSE 40S ribosomal protein S3 OS=Mus musculus GN=Rps3 PE=1 SV=1	P62908	27 kDa	0.28
RS13_MOUSE 40S ribosomal protein S13 OS=Mus musculus GN=Rps13 PE=2 SV=2	P62301	17 kDa	0.278
Q3TML0_MOUSE Protein disulfide-isomerase A6 OS=Mus musculus GN=Pdia6 PE=2 SV=1	Q3TML0	49 kDa	0.276
CY1_MOUSE Cytochrome c1, heme protein, mitochondrial OS=Mus musculus GN=Cyc1 PE=1 SV=1	Q9D0M3 (+1)	35 kDa	0.274
OST48_MOUSE Dolichyl-diphosphooligosaccharide--protein glycosyltransferase 48 kDa subunit OS=Mus musculus GN=Ddost PE=1 SV=2	O54734	49 kDa	0.274
RL7_MOUSE 60S ribosomal protein L7 OS=Mus musculus GN=Rpl7 PE=2 SV=2	P14148	31 kDa	0.274
RL7A_MOUSE 60S ribosomal protein L7a OS=Mus musculus GN=Rpl7a PE=2 SV=2	P12970	30 kDa	0.274
CY250_MOUSE Cytochrome P450 2C50 OS=Mus musculus GN=Cyp2c50 PE=1 SV=2	Q91X77	56 kDa	0.273
BDH_MOUSE D-beta-hydroxybutyrate dehydrogenase, mitochondrial OS=Mus musculus GN=Bdh1 PE=1 SV=2	Q80XN0	38 kDa	0.271
SC61B_MOUSE Protein transport protein Sec61 subunit beta OS=Mus musculus GN=Sec61b PE=1 SV=3	Q9CQS8	10 kDa	0.271
H2B2B_MOUSE Histone H2B type 2-B OS=Mus musculus GN=Hist2h2bb PE=1 SV=3	Q64525	14 kDa	0.27
RS19_MOUSE 40S ribosomal protein S19 OS=Mus musculus GN=Rps19 PE=1 SV=3	Q9CZX8	16 kDa	0.269
UD16_MOUSE UDP-glucuronosyltransferase 1-6 OS=Mus musculus GN=Ugt1a6 PE=1 SV=1	Q64435	60 kDa	0.269
QCR8_MOUSE Cytochrome b-c1 complex subunit 8 OS=Mus musculus GN=Uqcrq PE=1 SV=3	Q9CQ69	10 kDa	0.268
CP27A_MOUSE Sterol 26-hydroxylase, mitochondrial OS=Mus musculus GN=Cyp27a1 PE=1 SV=1	Q9DBG1	61 kDa	0.266
CP2DQ_MOUSE Cytochrome P450 2D26 OS=Mus musculus GN=Cyp2d26 PE=2 SV=1	Q8CIM7	57 kDa	0.266
B1ARW4_MOUSE NADH dehydrogenase [ubiquinone] iron-sulfur protein 5 (Fragment) OS=Mus musculus GN=Ndufs5 PE=2 SV=1	B1ARW4 (+1)	11 kDa	0.264
UDB17_MOUSE UDP-glucuronosyltransferase 2B17 OS=Mus musculus GN=Ugt2b17 PE=2 SV=1	P17717 (+2)	61 kDa	0.264
CP2D9_MOUSE Cytochrome P450 2D9 OS=Mus musculus GN=Cyp2d9 PE=2 SV=2	P11714	57 kDa	0.26
MOGS_MOUSE Mannosyl-oligosaccharide glucosidase OS=Mus musculus GN=Mogs PE=2 SV=1	Q80UM7	92 kDa	0.259
PRDX5_MOUSE Isoform Cytoplasmic+peroxisomal of Peroxiredoxin-5, mitochondrial OS=Mus musculus GN=Prdx5	P99029-2	17 kDa	0.259
SSRD_MOUSE Translocon-associated protein subunit delta OS=Mus musculus GN=Ssr4 PE=2 SV=1	Q62186 (+1)	19 kDa	0.256
K2C8_MOUSE Keratin, type II cytoskeletal 8 OS=Mus musculus GN=Krt8 PE=1 SV=4	P11679	55 kDa	0.255
RL28_MOUSE 60S ribosomal protein L28 OS=Mus musculus GN=Rpl28 PE=1 SV=2	P41105	16 kDa	0.255
UD11_MOUSE UDP-glucuronosyltransferase 1-1 OS=Mus musculus GN=Ugt1a1 PE=2 SV=2	Q63886	60 kDa	0.252
CP4AA_MOUSE Cytochrome P450 4A10 OS=Mus musculus GN=Cyp4a10 PE=2 SV=2	O88833	58 kDa	0.251
CP1A2_MOUSE Cytochrome P450 1A2 OS=Mus musculus GN=Cyp1a2 PE=1 SV=1	P00186	58 kDa	0.25
K9J7B2_MOUSE Protein Ugt1a6b OS=Mus musculus GN=Ugt1a6b PE=3 SV=1	K9J7B2	60 kDa	0.25
RL23A_MOUSE 60S ribosomal protein L23a OS=Mus musculus GN=Rpl23a PE=1 SV=1	P62751	18 kDa	0.25
RS27L_MOUSE 40S ribosomal protein S27-like OS=Mus musculus GN=Rps27l PE=2 SV=3	Q6ZWY3	9 kDa	0.25
DDX1_MOUSE ATP-dependent RNA helicase DDX1 OS=Mus musculus GN=Ddx1 PE=1 SV=1	Q91VR5	83 kDa	0.249
CX6B1_MOUSE Cytochrome c oxidase subunit 6B1 OS=Mus musculus GN=Cox6b1 PE=1 SV=2	P56391	10 kDa	0.244
RLA0_MOUSE 60S acidic ribosomal protein P0 OS=Mus musculus GN=Rplp0 PE=1 SV=3	P14869	34 kDa	0.243
G5E814_MOUSE MCG5603 OS=Mus musculus GN=Ndufa11 PE=4 SV=1	G5E814 (+1)	15 kDa	0.238
K1C14_MOUSE Keratin, type I cytoskeletal 14 OS=Mus musculus GN=Krt14 PE=1 SV=2	Q61781	53 kDa	0.238
ALDH2_MOUSE Aldehyde dehydrogenase, mitochondrial OS=Mus musculus GN=Aldh2 PE=1 SV=1	P47738	57 kDa	0.235
QIL1_MOUSE Protein QIL1 OS=Mus musculus GN=Qil1 PE=2 SV=1	Q8R404	13 kDa	0.235
RT30_MOUSE 28S ribosomal protein S30, mitochondrial OS=Mus musculus GN=Mrps30 PE=2 SV=1	Q9D0G0	50 kDa	0.233
RL34_MOUSE 60S ribosomal protein L34 OS=Mus musculus GN=Rpl34 PE=3 SV=2	Q9D1R9	13 kDa	0.231
MPC2_MOUSE Mitochondrial pyruvate carrier 2 OS=Mus musculus GN=Mpc2 PE=1 SV=1	Q9D023	14 kDa	0.228
D3Z6C3_MOUSE 40S ribosomal protein S3a OS=Mus musculus GN=Rps3a2 PE=3 SV=1	D3Z6C3 (+2)	30 kDa	0.227
ABCD3_MOUSE ATP-binding cassette sub-family D member 3 OS=Mus musculus GN=Abcd3 PE=1 SV=2	P55096	75 kDa	0.226
CPT1A_MOUSE Carnitine O-palmitoyltransferase 1, liver isoform OS=Mus musculus GN=Cpt1a PE=1 SV=4	P97742	88 kDa	0.226
LETM1_MOUSE LETM1 and EF-hand domain-containing protein 1, mitochondrial OS=Mus musculus GN=Letm1 PE=2 SV=1	Q9Z2I0	83 kDa	0.225
RL27A_MOUSE 60S ribosomal protein L27a OS=Mus musculus GN=Rpl27a PE=2 SV=5	P14115	17 kDa	0.223
RL35_MOUSE 60S ribosomal protein L35 OS=Mus musculus GN=Rpl35 PE=2 SV=1	Q6ZWV7	15 kDa	0.22
DECR_MOUSE 2,4-dienoyl-CoA reductase, mitochondrial OS=Mus musculus GN=Decr1 PE=1 SV=1	Q9CQ62	36 kDa	0.218
FINC_MOUSE Fibronectin OS=Mus musculus GN=Fn1 PE=1 SV=4	P11276	273 kDa	0.218
RS18_MOUSE 40S ribosomal protein S18 OS=Mus musculus GN=Rps18 PE=1 SV=3	P62270	18 kDa	0.217
E9PXN7_MOUSE UDP-glucuronosyltransferase 1-7C OS=Mus musculus GN=Ugt1a10 PE=2 SV=1	E9PXN7	60 kDa	0.215
TBL2_MOUSE Transducin beta-like protein 2 OS=Mus musculus GN=Tbl2 PE=2 SV=2	Q9R099	50 kDa	0.215
DHE3_MOUSE Glutamate dehydrogenase 1, mitochondrial OS=Mus musculus GN=Glud1 PE=1 SV=1	P26443	61 kDa	0.213
G3UX26_MOUSE Voltage-dependent anion-selective channel protein 2 (Fragment) OS=Mus musculus GN=Vdac2 PE=4 SV=1	G3UX26 (+1)	30 kDa	0.212
LRC59_MOUSE Leucine-rich repeat-containing protein 59 OS=Mus musculus GN=Lrrc59 PE=2 SV=1	Q922Q8	35 kDa	0.212
AAAD_MOUSE Arylacetamide deacetylase OS=Mus musculus GN=Aadac PE=1 SV=3	Q99PG0	45 kDa	0.211
CHCH3_MOUSE Coiled-coil-helix-coiled-coil-helix domain-containing protein 3, mitochondrial OS=Mus musculus GN=Chchd3 PE=1 SV=1	Q9CRB9	26 kDa	0.211
B1ASE2_MOUSE ATP synthase subunit d, mitochondrial (Fragment) OS=Mus musculus GN=Atp5h PE=2 SV=1	B1ASE2 (+2)	16 kDa	0.21
THIO_MOUSE Thioredoxin OS=Mus musculus GN=Txn PE=1 SV=3	P10639	12 kDa	0.21
ACOT4_MOUSE Acyl-coenzyme A thioesterase 4 OS=Mus musculus GN=Acot4 PE=2 SV=1	Q8BWN8	46 kDa	0.209
RS26_MOUSE 40S ribosomal protein S26 OS=Mus musculus GN=Rps26 PE=2 SV=3	P62855	13 kDa	0.209
NLTP_MOUSE Non-specific lipid-transfer protein OS=Mus musculus GN=Scp2 PE=1 SV=3	P32020	59 kDa	0.207
K1C16_MOUSE Keratin, type I cytoskeletal 16 OS=Mus musculus GN=Krt16 PE=1 SV=3	Q9Z2K1	52 kDa	0.205
ECI1_MOUSE Enoyl-CoA delta isomerase 1, mitochondrial OS=Mus musculus GN=Eci1 PE=1 SV=2	P42125	32 kDa	0.204
K2C6A_MOUSE Keratin, type II cytoskeletal 6A OS=Mus musculus GN=Krt6a PE=2 SV=3	P50446	59 kDa	0.204
NDUA7_MOUSE NADH dehydrogenase [ubiquinone] 1 alpha subcomplex subunit 7 OS=Mus musculus GN=Ndufa7 PE=1 SV=3	Q9Z1P6	13 kDa	0.204
RS24_MOUSE 40S ribosomal protein S24 OS=Mus musculus GN=Rps24 PE=2 SV=1	P62849 (+2)	15 kDa	0.203
K1C42_MOUSE Keratin, type I cytoskeletal 42 OS=Mus musculus GN=Krt42 PE=1 SV=1	Q6IFX2	50 kDa	0.201
MOSC2_MOUSE MOSC domain-containing protein 2, mitochondrial OS=Mus musculus GN=Marc2 PE=1 SV=1	Q922Q1	38 kDa	0.201
PLAK_MOUSE Junction plakoglobin OS=Mus musculus GN=Jup PE=1 SV=3	Q02257	82 kDa	0.199
CN166_MOUSE UPF0568 protein C14orf166 homolog OS=Mus musculus PE=2 SV=1	Q9CQE8	28 kDa	0.197
SUCA_MOUSE Succinyl-CoA ligase [ADP/GDP-forming] subunit alpha, mitochondrial OS=Mus musculus GN=Suclg1 PE=1 SV=4	Q9WUM5	36 kDa	0.197
DAD1_MOUSE Dolichyl-diphosphooligosaccharide--protein glycosyltransferase subunit DAD1 OS=Mus musculus GN=Dad1 PE=2 SV=3	P61804	12 kDa	0.195
GBB2_MOUSE Guanine nucleotide-binding protein G(I)/G(S)/G(T) subunit beta-2 OS=Mus musculus GN=Gnb2 PE=1 SV=3	P62880	37 kDa	0.194
RDH7_MOUSE Retinol dehydrogenase 7 OS=Mus musculus GN=Rdh7 PE=2 SV=1	O88451	36 kDa	0.193
A2A547_MOUSE Ribosomal protein L19 OS=Mus musculus GN=Rpl19 PE=2 SV=1	A2A547 (+1)	23 kDa	0.191
E9QAZ2_MOUSE Ribosomal protein L15 OS=Mus musculus GN=Gm10020 PE=3 SV=1	E9QAZ2 (+1)	24 kDa	0.191
NDUA6_MOUSE NADH dehydrogenase [ubiquinone] 1 alpha subcomplex subunit 6 OS=Mus musculus GN=Ndufa6 PE=1 SV=1	Q9CQZ5	15 kDa	0.191
DDX3X_MOUSE ATP-dependent RNA helicase DDX3X OS=Mus musculus GN=Ddx3x PE=1 SV=3	Q62167	73 kDa	0.189
CP254_MOUSE Cytochrome P450 2C54 OS=Mus musculus GN=Cyp2c54 PE=2 SV=1	Q6XVG2	56 kDa	0.186
Q9JKY7_MOUSE Cytochrome P450 CYP2D22 OS=Mus musculus GN=Cyp2d22 PE=2 SV=1	Q9JKY7	56 kDa	0.186
CP4CA_MOUSE Cytochrome P450 4A12A OS=Mus musculus GN=Cyp4a12a PE=2 SV=2	Q91WL5	58 kDa	0.185
RM41_MOUSE 39S ribosomal protein L41, mitochondrial OS=Mus musculus GN=Mrpl41 PE=2 SV=1	Q9CQN7	15 kDa	0.185
S61A1_MOUSE Protein transport protein Sec61 subunit alpha isoform 1 OS=Mus musculus GN=Sec61a1 PE=2 SV=2	P61620	52 kDa	0.185
NDUB7_MOUSE NADH dehydrogenase [ubiquinone] 1 beta subcomplex subunit 7 OS=Mus musculus GN=Ndufb7 PE=1 SV=3	Q9CR61	16 kDa	0.182
FMO5_MOUSE Dimethylaniline monooxygenase [N-oxide-forming] 5 OS=Mus musculus GN=Fmo5 PE=2 SV=4	P97872	60 kDa	0.18
K2C5_MOUSE Keratin, type II cytoskeletal 5 OS=Mus musculus GN=Krt5 PE=1 SV=1	Q922U2	62 kDa	0.179
SYJ2B_MOUSE Synaptojanin-2-binding protein OS=Mus musculus GN=Synj2bp PE=1 SV=1	Q9D6K5	16 kDa	0.179
DHSA_MOUSE Succinate dehydrogenase [ubiquinone] flavoprotein subunit, mitochondrial OS=Mus musculus GN=Sdha PE=1 SV=1	Q8K2B3	73 kDa	0.178
NIPS1_MOUSE Protein NipSnap homolog 1 OS=Mus musculus GN=Nipsnap1 PE=1 SV=1	O55125	33 kDa	0.176
EF1A1_MOUSE Elongation factor 1-alpha 1 OS=Mus musculus GN=Eef1a1 PE=1 SV=3	P10126	50 kDa	0.173
RL14_MOUSE 60S ribosomal protein L14 OS=Mus musculus GN=Rpl14 PE=2 SV=3	Q9CR57	24 kDa	0.171
CMLO2_MOUSE Probable N-acetyltransferase CML2 OS=Mus musculus GN=Cml2 PE=1 SV=1	Q8CHQ9	26 kDa	0.168
CALX_MOUSE Calnexin OS=Mus musculus GN=Canx PE=1 SV=1	P35564	67 kDa	0.164
SOX_MOUSE Peroxisomal sarcosine oxidase OS=Mus musculus GN=Pipox PE=1 SV=1	Q9D826	44 kDa	0.164
PROD2_MOUSE Probable proline dehydrogenase 2 OS=Mus musculus GN=Prodh2 PE=1 SV=1	Q8VCZ9	51 kDa	0.162
Q3UEP4_MOUSE MCG1788 OS=Mus musculus GN=Ugt2b36 PE=2 SV=1	Q3UEP4	61 kDa	0.162
RS23_MOUSE 40S ribosomal protein S23 OS=Mus musculus GN=Rps23 PE=2 SV=3	P62267	16 kDa	0.161
RS25_MOUSE 40S ribosomal protein S25 OS=Mus musculus GN=Rps25 PE=2 SV=1	P62852	14 kDa	0.16
E9Q8I0_MOUSE Complement factor H OS=Mus musculus GN=Cfh PE=2 SV=1	E9Q8I0 (+1)	141 kDa	0.159
ROA2_MOUSE Heterogeneous nuclear ribonucleoproteins A2/B1 OS=Mus musculus GN=Hnrnpa2b1 PE=1 SV=2	O88569 (+2)	37 kDa	0.159
PLCB_MOUSE 1-acyl-sn-glycerol-3-phosphate acyltransferase beta OS=Mus musculus GN=Agpat2 PE=2 SV=1	Q8K3K7	31 kDa	0.158
Q9CZN7_MOUSE Serine hydroxymethyltransferase OS=Mus musculus GN=Shmt2 PE=2 SV=1	Q9CZN7	56 kDa	0.157
A8DUK4_MOUSE Beta-globin OS=Mus musculus GN=Hbbt1 PE=3 SV=1	A8DUK4	16 kDa	0.156
HCDH_MOUSE Hydroxyacyl-coenzyme A dehydrogenase, mitochondrial OS=Mus musculus GN=Hadh PE=1 SV=2	Q61425	34 kDa	0.156
TIM50_MOUSE Mitochondrial import inner membrane translocase subunit TIM50 OS=Mus musculus GN=Timm50 PE=1 SV=1	Q9D880	40 kDa	0.156
D3YTS1_MOUSE Sec11-like 1 (S. cerevisiae), isoform CRA_d OS=Mus musculus GN=Sec11a PE=4 SV=1	D3YTS1 (+3)	28 kDa	0.154
E9Q3V2_MOUSE UDP-N-acetylglucosamine transporter (Fragment) OS=Mus musculus GN=Slc35a3 PE=2 SV=1	E9Q3V2	22 kDa	0.153
PIGR_MOUSE Polymeric immunoglobulin receptor OS=Mus musculus GN=Pigr PE=1 SV=1	O70570	85 kDa	0.153
SPEB_MOUSE Agmatinase, mitochondrial OS=Mus musculus GN=Agmat PE=1 SV=1	A2AS89	38 kDa	0.151
ZO2_MOUSE Tight junction protein ZO-2 OS=Mus musculus GN=Tjp2 PE=1 SV=2	Q9Z0U1	131 kDa	0.15
APOOL_MOUSE Apolipoprotein O-like OS=Mus musculus GN=Apool PE=2 SV=1	Q78IK4	29 kDa	0.147
G3UWE1_MOUSE MCG11048, isoform CRA_c OS=Mus musculus GN=Tecr PE=4 SV=1	G3UWE1 (+2)	34 kDa	0.147
S27A5_MOUSE Bile acyl-CoA synthetase OS=Mus musculus GN=Slc27a5 PE=2 SV=2	Q4LDG0	76 kDa	0.147
COX41_MOUSE Cytochrome c oxidase subunit 4 isoform 1, mitochondrial OS=Mus musculus GN=Cox4i1 PE=1 SV=2	P19783	20 kDa	0.142
LONP2_MOUSE Lon protease homolog 2, peroxisomal OS=Mus musculus GN=Lonp2 PE=2 SV=1	Q9DBN5	95 kDa	0.142
G3P_MOUSE Glyceraldehyde-3-phosphate dehydrogenase OS=Mus musculus GN=Gapdh PE=1 SV=2	P16858 (+1)	36 kDa	0.141
CP2AC_MOUSE Cytochrome P450 2A12 OS=Mus musculus GN=Cyp2a12 PE=1 SV=2	P56593	56 kDa	0.14
GHC1_MOUSE Mitochondrial glutamate carrier 1 OS=Mus musculus GN=Slc25a22 PE=1 SV=1	Q9D6M3	35 kDa	0.139
RS10_MOUSE 40S ribosomal protein S10 OS=Mus musculus GN=Rps10 PE=1 SV=1	P63325	19 kDa	0.139
Q8JZU2_MOUSE Protein Slc25a1 OS=Mus musculus GN=Slc25a1 PE=2 SV=1	Q8JZU2	34 kDa	0.138
GPAT1_MOUSE Glycerol-3-phosphate acyltransferase 1, mitochondrial OS=Mus musculus GN=Gpam PE=1 SV=2	Q61586	94 kDa	0.137
IGHM_MOUSE Ig mu chain C region OS=Mus musculus GN=Ighm PE=1 SV=2	P01872 (+1)	50 kDa	0.137
DHRS4_MOUSE Dehydrogenase/reductase SDR family member 4 OS=Mus musculus GN=Dhrs4 PE=1 SV=3	Q99LB2	30 kDa	0.136
IMMT_MOUSE Isoform 5 of Mitochondrial inner membrane protein OS=Mus musculus GN=Immt	Q8CAQ8-5	88 kDa	0.135
B1ATI0_MOUSE Aldehyde dehydrogenase OS=Mus musculus GN=Aldh3a2 PE=2 SV=1	B1ATI0	59 kDa	0.133
B1B1D8_MOUSE 39S ribosomal protein L2, mitochondrial OS=Mus musculus GN=Mrpl2 PE=2 SV=1	B1B1D8 (+1)	33 kDa	0.132
CP2F2_MOUSE Cytochrome P450 2F2 OS=Mus musculus GN=Cyp2f2 PE=2 SV=1	P33267	56 kDa	0.132
PABP1_MOUSE Polyadenylate-binding protein 1 OS=Mus musculus GN=Pabpc1 PE=1 SV=2	P29341	71 kDa	0.131
A2A513_MOUSE Keratin, type I cytoskeletal 10 OS=Mus musculus GN=Krt10 PE=3 SV=1	A2A513 (+3)	57 kDa	0.13
E9QNH7_MOUSE Acyl-CoA-binding domain-containing protein 5 OS=Mus musculus GN=Acbd5 PE=2 SV=1	E9QNH7 (+1)	57 kDa	0.13
D3Z3K1_MOUSE MCG11809 OS=Mus musculus GN=Gm10288 PE=3 SV=1	D3Z3K1 (+2)	20 kDa	0.129
THIKB_MOUSE 3-ketoacyl-CoA thiolase B, peroxisomal OS=Mus musculus GN=Acaa1b PE=1 SV=1	Q8VCH0	44 kDa	0.127
D3Z3R1_MOUSE 60S ribosomal protein L36 OS=Mus musculus GN=Gm5745 PE=3 SV=1	D3Z3R1 (+1)	12 kDa	0.125
C560_MOUSE Succinate dehydrogenase cytochrome b560 subunit, mitochondrial OS=Mus musculus GN=Sdhc PE=2 SV=1	Q9CZB0	18 kDa	0.124
AFG32_MOUSE AFG3-like protein 2 OS=Mus musculus GN=Afg3l2 PE=1 SV=1	Q8JZQ2	90 kDa	0.123
J3QMG3_MOUSE Voltage-dependent anion-selective channel protein 3 OS=Mus musculus GN=Vdac3 PE=2 SV=1	J3QMG3 (+1)	31 kDa	0.123
Q8C6B0_MOUSE MCG20149, isoform CRA_a OS=Mus musculus GN=Mettl7a1 PE=2 SV=1	Q8C6B0	28 kDa	0.123
BAP31_MOUSE B-cell receptor-associated protein 31 OS=Mus musculus GN=Bcap31 PE=1 SV=4	Q61335	28 kDa	0.122
ANXA2_MOUSE Annexin A2 OS=Mus musculus GN=Anxa2 PE=1 SV=2	P07356	39 kDa	0.121
S27A2_MOUSE Very long-chain acyl-CoA synthetase OS=Mus musculus GN=Slc27a2 PE=1 SV=2	O35488	70 kDa	0.121
TGM1_MOUSE Protein-glutamine gamma-glutamyltransferase K OS=Mus musculus GN=Tgm1 PE=1 SV=2	Q9JLF6	90 kDa	0.121
E9PXX7_MOUSE Thioredoxin domain-containing protein 5 OS=Mus musculus GN=Txndc5 PE=2 SV=1	E9PXX7 (+1)	39 kDa	0.119
PGRC1_MOUSE Membrane-associated progesterone receptor component 1 OS=Mus musculus GN=Pgrmc1 PE=1 SV=4	O55022	22 kDa	0.118
NDUC2_MOUSE NADH dehydrogenase [ubiquinone] 1 subunit C2 OS=Mus musculus GN=Ndufc2 PE=1 SV=1	Q9CQ54	14 kDa	0.117
DJC10_MOUSE DnaJ homolog subfamily C member 10 OS=Mus musculus GN=Dnajc10 PE=1 SV=2	Q9DC23	91 kDa	0.116
AT1B1_MOUSE Sodium/potassium-transporting ATPase subunit beta-1 OS=Mus musculus GN=Atp1b1 PE=1 SV=1	P14094	35 kDa	0.115
ATAD3_MOUSE ATPase family AAA domain-containing protein 3 OS=Mus musculus GN=Atad3 PE=1 SV=1	Q925I1	67 kDa	0.115
E9Q1Z0_MOUSE Protein 4732456N10Rik OS=Mus musculus GN=4732456N10Rik PE=3 SV=1	E9Q1Z0	58 kDa	0.115
REEP6_MOUSE Receptor expression-enhancing protein 6 OS=Mus musculus GN=Reep6 PE=2 SV=1	Q9JM62 (+1)	22 kDa	0.114
AT1A1_MOUSE Sodium/potassium-transporting ATPase subunit alpha-1 OS=Mus musculus GN=Atp1a1 PE=1 SV=1	Q8VDN2	113 kDa	0.113
PON3_MOUSE Serum paraoxonase/lactonase 3 OS=Mus musculus GN=Pon3 PE=1 SV=2	Q62087	39 kDa	0.113
UCRI_MOUSE Cytochrome b-c1 complex subunit Rieske, mitochondrial OS=Mus musculus GN=Uqcrfs1 PE=1 SV=1	Q9CR68	29 kDa	0.113
B1AQ77_MOUSE Keratin 15, isoform CRA_a OS=Mus musculus GN=Krt15 PE=3 SV=1	B1AQ77 (+1)	49 kDa	0.112
E9Q5K4_MOUSE Protein Cyp2c44 OS=Mus musculus GN=Cyp2c44 PE=2 SV=1	E9Q5K4	56 kDa	0.111
ACNT1_MOUSE Acyl-coenzyme A amino acid N-acyltransferase 1 OS=Mus musculus GN=Acnat1 PE=1 SV=1	A2AKK5 (+1)	46 kDa	0.103
CENPV_MOUSE Centromere protein V OS=Mus musculus GN=Cenpv PE=2 SV=2	Q9CXS4	28 kDa	0.103
E9Q8I7_MOUSE Protein Nfxl1 OS=Mus musculus GN=Nfxl1 PE=2 SV=1	E9Q8I7	102 kDa	0.103
NDUS7_MOUSE NADH dehydrogenase [ubiquinone] iron-sulfur protein 7, mitochondrial OS=Mus musculus GN=Ndufs7 PE=1 SV=1	Q9DC70	25 kDa	0.103
Q8K154_MOUSE Protein Ugt2b34 OS=Mus musculus GN=Ugt2b34 PE=2 SV=1	Q8K154	61 kDa	0.103
NUDT7_MOUSE Peroxisomal coenzyme A diphosphatase NUDT7 OS=Mus musculus GN=Nudt7 PE=1 SV=2	Q99P30 (+1)	27 kDa	0.102
RS2_MOUSE 40S ribosomal protein S2 OS=Mus musculus GN=Rps2 PE=2 SV=3	P25444	31 kDa	0.102
AOFB_MOUSE Amine oxidase [flavin-containing] B OS=Mus musculus GN=Maob PE=1 SV=4	Q8BW75	59 kDa	0.1
K3W4R4_MOUSE Collagen alpha-1(XIV) chain OS=Mus musculus GN=Col14a1 PE=2 SV=1	K3W4R4 (+2)	193 kDa	0.1
